# Supplementary material for: Deep learning feature-based model for predicting lymphovascular invasion in urothelial carcinoma of bladder using CT images
Source: Springer Nature journal article supplement (doi:10.1186/s13244-025-01988-6), 2025-05-18
Supplement: MOESM1 [file 13244_2025_1988_MOESM1_ESM.pdf]

# Deep Learning Feature-based Model for Predicting Lymphovascular invasion in Urothelial Carcinoma of Bladder Using CT Images

## ELECTRONIC SUPPLEMENTARY MATERIAL

**Table S1** The CT protocols of the four centers

| Parameters                | Center 1                                                                                          | Center 2                                         | Center 3                                                                           | Center 4                                                                                |
|---------------------------|---------------------------------------------------------------------------------------------------|--------------------------------------------------|------------------------------------------------------------------------------------|-----------------------------------------------------------------------------------------|
| CT version                | Discovery CT750 HD (GE Healthcare, USA) or SOMATOM Definition Flash (Siemens Healthcare, Germany) | Brilliance iCT (Philips Healthcare, Netherlands) | Aquilion One (Toshiba Medical Systems, Japan); LightSpeed VCT (GE Healthcare, USA) | SOMATOM Definition AS (Siemens Healthcare, Germany); Revolution CT (GE Healthcare, USA) |
| CT tube voltage           | 100-120 kV                                                                                        | 100–120 kV                                       | 110-120 kV                                                                         | 100-120 kV                                                                              |
| CT tube current           | 200-500 mA                                                                                        | 125–360 mAs                                      | 250-450 mA                                                                         | 100-250 mA                                                                              |
| Gantry rotation time      | 0.50-0.60 s                                                                                       | 0.27s                                            | 0.50s                                                                              | 0.28-0.33s                                                                              |
| Detector collimation (mm) | 0.625 mm                                                                                          | 0.625 mm                                         | 0.625 mm                                                                           | 0.6-0.625 mm                                                                            |
| Image matrix              | 512*512                                                                                           | 512*512                                          | 512*512                                                                            | 512*512                                                                                 |
| Slice thickness           | 5-7 mm                                                                                            | 1-7 mm                                           | 1-7 mm                                                                             | 1-5 mm                                                                                  |

kV = kilovolt, mA = milliampere, mm = milimetre.

## Introduction for CNN model training

```
{ batch_balance=True,
  normalize_method='imagenet',
  model_name='vgg11',
  gpus=[0],
  batch_size=64,
  epochs=100,
  init_lr=0.01,
  optimizer='sgd',
  retrain=None,
  iters_start=0,
  iters_verbose=1,
  pretrained=True }
```

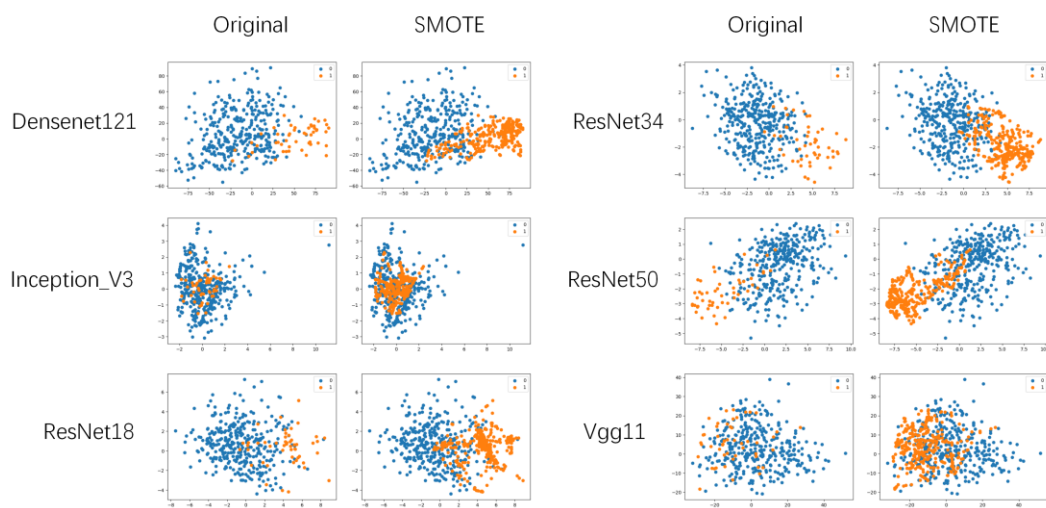

**Figure S1** The distribution of original samples and distribution of SMOTE samples.

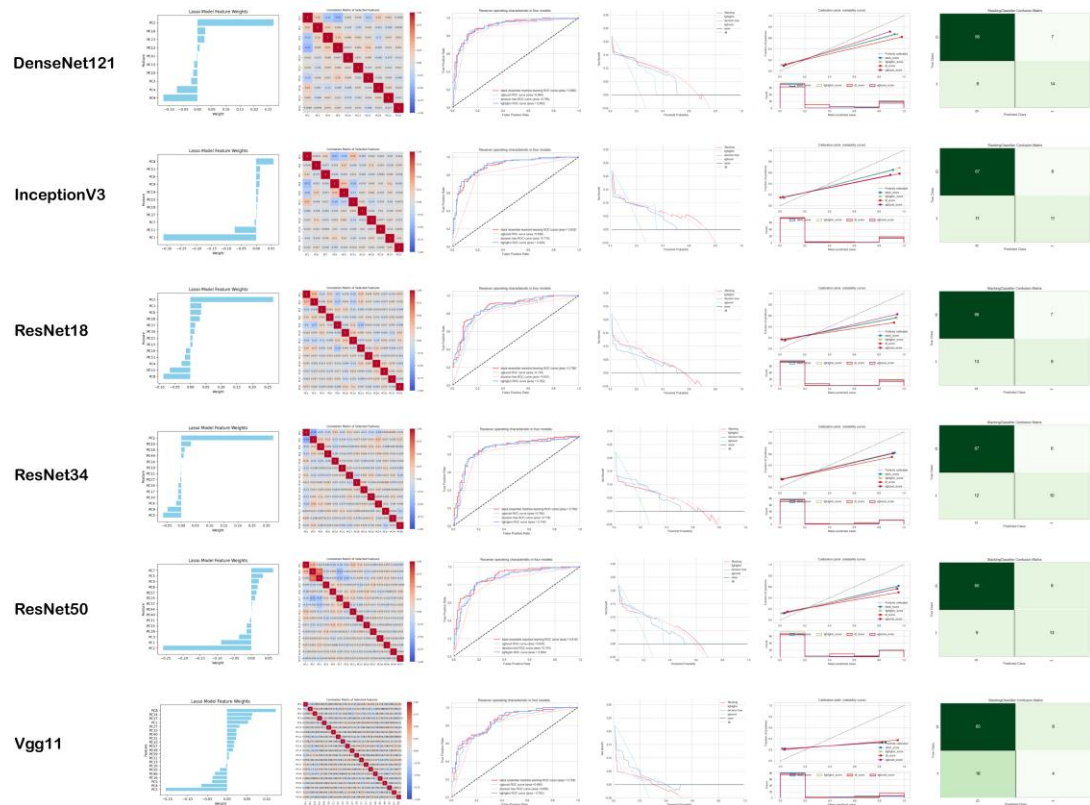

**Figure S2** The result of six CNN feature-based stacking model and their base model(dt, xgboost, lightgbm) in Validation set

**Table S2** Results of delong test for six CNN models

| Training set | <i>p Value</i> | Validation set | <i>p Value</i> | Testing set  | <i>p Value</i> |
|--------------|----------------|----------------|----------------|--------------|----------------|
| Densenet121  | 0.074          | Densenet121    | 0.362          | Densenet121  | 0.345          |
| Inception_V3 | 0.005          | Inception_V3   | 0.676          | Inception_V3 | 0.631          |
| ResNet18     | 0.031          | ResNet18       | 0.273          | ResNet18     | 0.181          |
| ResNet34     | 0.135          | ResNet34       | 0.161          | ResNet34     | 0.573          |
| ResNet50     | reference      | ResNet50       | reference      | ResNet50     | reference      |
| Vgg11        | 0.151          | Vgg11          | 0.075          | Vgg11        | 0.917          |

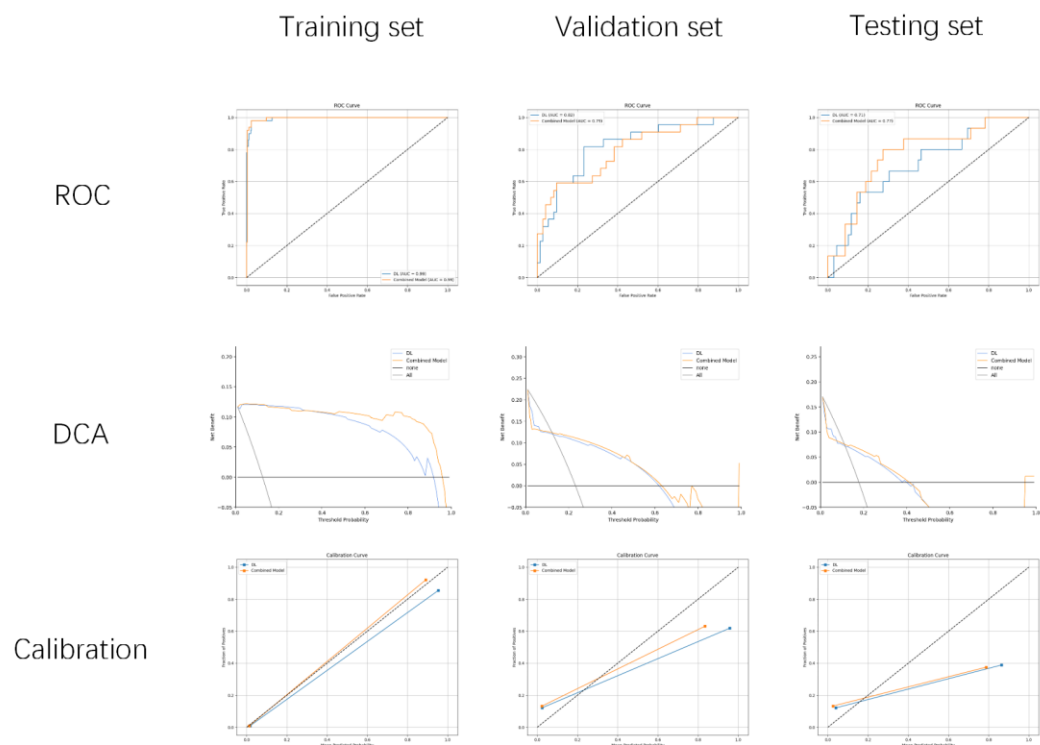

**Figure S3** The result of DL Model and Combined Model (with SMOTE).

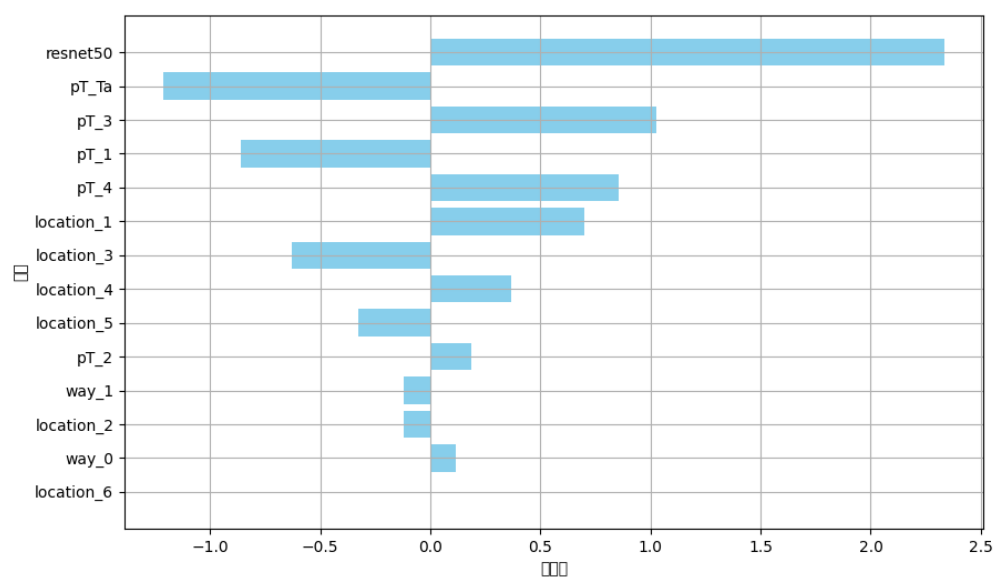

**Figure S4** The coefficients of the factors in the Combined Model.

'resnet50'=DL, 'location\_1'= left wall, 'location\_2'=right wall, 'location\_3'=anterior wall, 'location\_4'=posterior wall, 'location\_5'=parietal wall, 'location\_6'=bladder neck, 'way\_0'= within bladder wall, 'way\_1'= into bladder cavity

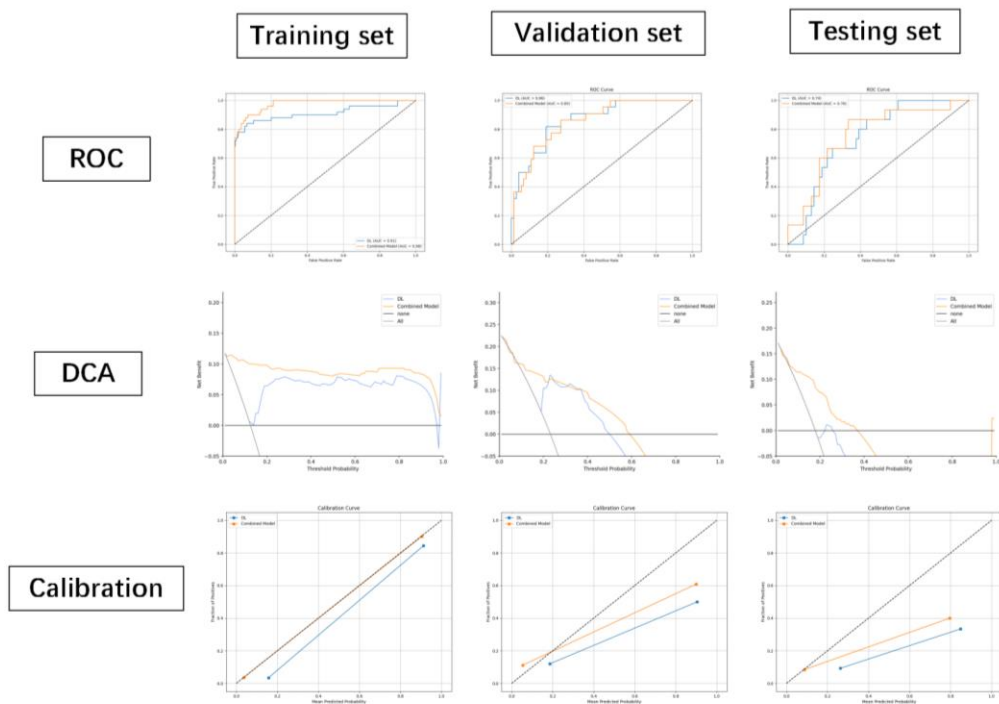

**Figure S5** The result of original DL Model and original Combined Model (without SMOTE).

**Table S3** The performance comparison of original CNN models (**without** SMOTE)

| <b>Model</b> | <b>Set</b>   | <b>AUC</b> | <b>95%CI</b> | <b>ACC</b> | <b>95%CI</b> | <b>SEN</b> | <b>SPE</b> |
|--------------|--------------|------------|--------------|------------|--------------|------------|------------|
| Densenet121  | <b>Train</b> | 0.909      | 0.844,0.973  | 0.957      | 0.957,0.957  | 0.780      | 0.983      |
|              | <b>Val</b>   | 0.796      | 0.670,0.921  | 0.789      | 0.786,0.793  | 0.818      | 0.781      |
|              | <b>Test</b>  | 0.658      | 0.493,0.823  | 0.750      | 0.746,0.754  | 0.533      | 0.797      |
| Inception_V3 | <b>Train</b> | 0.913      | 0.848,0.977  | 0.927      | 0.927,0.927  | 0.820      | 0.943      |
|              | <b>Val</b>   | 0.819      | 0.712,0.927  | 0.800      | 0.797,0.803  | 0.773      | 0.808      |
|              | <b>Test</b>  | 0.668      | 0.508,0.827  | 0.631      | 0.626,0.636  | 0.800      | 0.594      |
| ResNet18     | <b>Train</b> | 0.892      | 0.823,0.96   | 0.899      | 0.899,0.900  | 0.840      | 0.908      |
|              | <b>Val</b>   | 0.780      | 0.671,0.89   | 0.789      | 0.786,0.793  | 0.591      | 0.849      |
|              | <b>Test</b>  | 0.602      | 0.416,0.788  | 0.679      | 0.673,0.684  | 0.600      | 0.696      |
| ResNet34     | <b>Train</b> | 0.976      | 0.959,0.994  | 0.912      | 0.911,0.912  | 0.980      | 0.902      |
|              | <b>Val</b>   | 0.800      | 0.689,0.91   | 0.842      | 0.839,0.845  | 0.682      | 0.890      |
|              | <b>Test</b>  | 0.713      | 0.587,0.839  | 0.583      | 0.578,0.589  | 0.933      | 0.507      |
| ResNet50     | <b>Train</b> | 0.911      | 0.849,0.974  | 0.922      | 0.921,0.922  | 0.840      | 0.934      |
|              | <b>Val</b>   | 0.864      | 0.782,0.946  | 0.811      | 0.807,0.814  | 0.818      | 0.808      |
|              | <b>Test</b>  | 0.739      | 0.623,0.855  | 0.702      | 0.607,0.798  | 0.667      | 0.710      |
| Vgg11        | <b>Train</b> | 0.804      | 0.721,0.887  | 0.864      | 0.864,0.865  | 0.660      | 0.894      |
|              | <b>Val</b>   | 0.699      | 0.566,0.831  | 0.758      | 0.754,0.762  | 0.545      | 0.822      |
|              | <b>Test</b>  | 0.680      | 0.521,0.839  | 0.631      | 0.626,0.636  | 0.800      | 0.594      |

CNN: Convolutional neural network; AUC: Area under the curve; ACC: Accuracy; SEN: Sensitivity; SPE: Specificity; 95%CI: Confidence Interval = 95%; Train: Training set; Val: Validation set; Test: Testing set

**Table S4** The performance of models based on radiomics features

| <b>Model</b> | <b>Set</b>   | <b>AUC</b> | <b>95%CI</b> | <b>ACC</b> | <b>95%CI</b> | <b>SEN</b> | <b>SPE</b> |
|--------------|--------------|------------|--------------|------------|--------------|------------|------------|
| Radiomics    | <b>Train</b> | 0.827      | 0.752, 0.901 | 0.849      | 0.849, 0.850 | 0.760      | 0.862      |
|              | <b>Val</b>   | 0.740      | 0.612, 0.867 | 0.768      | 0.765, 0.772 | 0.636      | 0.808      |
|              | <b>Test</b>  | 0.705      | 0.545, 0.866 | 0.821      | 0.818, 0.825 | 0.533      | 0.884      |
| Rad_smote    | <b>Train</b> | 0.981      | 0.969, 0.992 | 0.963      | 0.963, 0.963 | 0.986      | 0.940      |
|              | <b>Val</b>   | 0.804      | 0.731, 0.878 | 0.774      | 0.772, 0.776 | 0.767      | 0.781      |
|              | <b>Test</b>  | 0.714      | 0.628, 0.800 | 0.674      | 0.671, 0.677 | 0.696      | 0.652      |

Radiomics: The ensemble model based on radiomics features (without SMOTE); Rad\_smote: The ensemble model based on radiomics features (with SMOTE); AUC: Area under the curve; ACC: Accuracy; SEN: Sensitivity; SPE: Specificity; 95%CI: Confidence Interval = 95%; Train: Training set; Val: Validation set; Test: Testing set

**Table S5** The performance of clinical model

| Model          | AUC   | 95%CI          | Accuracy | 95%CI          | Sens  | Spec  |
|----------------|-------|----------------|----------|----------------|-------|-------|
| Training set   | 0.843 | (0.783, 0.897) | 0.879    | (0.847, 0.910) | 0.1   | 0.991 |
| Validation set | 0.776 | (0.667, 0.875) | 0.768    | (0.684, 0.853) | 0.045 | 0.986 |
| Testing set    | 0.665 | (0.471, 0.855) | 0.821    | (0.738, 0.893) | 0     | 1.000 |

AUC: Area under the curve; ACC: Accuracy; SEN: Sensitivity; SPE: Specificity; 95%CI: Confidence Interval = 95%; Train: Training set; Val: Validation set; Test: Testing set

## CLEAR Checklist v1.0

**Note:** Use the checklist in conjunction with the main text for clarification of all items.  
Yes, details provided; No, details not provided; n/e, not essential; n/a, not applicable; Page, page number

| Section               | No. | Item                                                          | Yes                                 | No                                  | n/a                                 | Page |
|-----------------------|-----|---------------------------------------------------------------|-------------------------------------|-------------------------------------|-------------------------------------|------|
| <b>Title</b>          |     |                                                               |                                     |                                     |                                     |      |
|                       | 1   | Relevant title, specifying the radiomic methodology           | <input checked="" type="checkbox"/> | <input type="checkbox"/>            | <input type="checkbox"/>            | 1    |
| <b>Abstract</b>       |     |                                                               |                                     |                                     |                                     |      |
|                       | 2   | Structured summary with relevant information                  | <input checked="" type="checkbox"/> | <input type="checkbox"/>            | <input type="checkbox"/>            | 1    |
| <b>Keywords</b>       |     |                                                               |                                     |                                     |                                     |      |
|                       | 3   | Relevant keywords for radiomics                               | <input checked="" type="checkbox"/> | <input type="checkbox"/>            | <input type="checkbox"/>            | 1    |
| <b>Introduction</b>   |     |                                                               |                                     |                                     |                                     |      |
|                       | 4   | Scientific or clinical background                             | <input checked="" type="checkbox"/> | <input type="checkbox"/>            | <input type="checkbox"/>            | 1    |
|                       | 5   | Rationale for using a radiomic approach                       | <input checked="" type="checkbox"/> | <input type="checkbox"/>            | <input type="checkbox"/>            | 2    |
|                       | 6   | Study objective(s)                                            | <input checked="" type="checkbox"/> | <input type="checkbox"/>            | <input type="checkbox"/>            | 1-2  |
| <b>Method</b>         |     |                                                               |                                     |                                     |                                     |      |
| <i>Study design</i>   | 7   | Adherence to guidelines or checklists (e.g., CLEAR checklist) | <input checked="" type="checkbox"/> | <input type="checkbox"/>            | <input type="checkbox"/>            | 2    |
|                       | 8   | Ethical details (e.g., approval, consent, data protection)    | <input checked="" type="checkbox"/> | <input type="checkbox"/>            | <input type="checkbox"/>            | 2    |
|                       | 9   | Sample size calculation                                       | <input type="checkbox"/>            | <input type="checkbox"/>            | <input checked="" type="checkbox"/> |      |
|                       | 10  | Study nature (e.g., retrospective, prospective)               | <input checked="" type="checkbox"/> | <input type="checkbox"/>            | <input type="checkbox"/>            | 2    |
|                       | 11  | Eligibility criteria                                          | <input checked="" type="checkbox"/> | <input type="checkbox"/>            | <input type="checkbox"/>            | 2    |
|                       | 12  | Flowchart for technical pipeline                              | <input checked="" type="checkbox"/> | <input type="checkbox"/>            | <input type="checkbox"/>            | 3    |
| <i>Data</i>           | 13  | Data source (e.g., private, public)                           | <input checked="" type="checkbox"/> | <input type="checkbox"/>            | <input type="checkbox"/>            | 2    |
|                       | 14  | Data overlap                                                  | <input type="checkbox"/>            | <input checked="" type="checkbox"/> | <input type="checkbox"/>            |      |
|                       | 15  | Data split methodology                                        | <input checked="" type="checkbox"/> | <input type="checkbox"/>            | <input type="checkbox"/>            | 2    |
|                       | 16  | Imaging protocol (i.e., image acquisition and processing)     | <input checked="" type="checkbox"/> | <input type="checkbox"/>            | <input type="checkbox"/>            | 2-3  |
|                       | 17  | Definition of non-radiomic predictor variables                | <input type="checkbox"/>            | <input type="checkbox"/>            | <input checked="" type="checkbox"/> |      |
|                       | 18  | Definition of the reference standard (i.e., outcome variable) | <input checked="" type="checkbox"/> | <input type="checkbox"/>            | <input type="checkbox"/>            | 4    |
| <i>Segmentation</i>   | 19  | Segmentation strategy                                         | <input checked="" type="checkbox"/> | <input type="checkbox"/>            | <input type="checkbox"/>            | 2-3  |
|                       | 20  | Details of operators performing segmentation                  | <input checked="" type="checkbox"/> | <input type="checkbox"/>            | <input type="checkbox"/>            | 2-3  |
| <i>Pre-processing</i> | 21  | Image pre-processing details                                  | <input checked="" type="checkbox"/> | <input type="checkbox"/>            | <input type="checkbox"/>            | 2-3  |
|                       | 22  | Resampling method and its parameters                          | <input checked="" type="checkbox"/> | <input type="checkbox"/>            | <input type="checkbox"/>            | 2-3  |
|                       | 23  | Discretization method and its parameters                      | <input checked="" type="checkbox"/> | <input type="checkbox"/>            | <input type="checkbox"/>            | 2-3  |



| Section            | No. | Item                                                               | Yes                                 | No                       | n/a                                 | Page |
|--------------------|-----|--------------------------------------------------------------------|-------------------------------------|--------------------------|-------------------------------------|------|
|                    | 24  | Image types (e.g., original, filtered, transformed)                | <input checked="" type="checkbox"/> | <input type="checkbox"/> | <input type="checkbox"/>            | 2    |
| Feature extraction | 25  | Feature extraction method                                          | <input checked="" type="checkbox"/> | <input type="checkbox"/> | <input type="checkbox"/>            | 3    |
|                    | 26  | Feature classes                                                    | <input type="checkbox"/>            | <input type="checkbox"/> | <input checked="" type="checkbox"/> |      |
|                    | 27  | Number of features                                                 | <input checked="" type="checkbox"/> | <input type="checkbox"/> | <input type="checkbox"/>            | 3    |
|                    | 28  | Default configuration statement for remaining parameters           | <input type="checkbox"/>            | <input type="checkbox"/> | <input checked="" type="checkbox"/> |      |
| Data preparation   | 29  | Handling of missing data                                           | <input checked="" type="checkbox"/> | <input type="checkbox"/> | <input type="checkbox"/>            | 2    |
|                    | 30  | Details of class imbalance                                         | <input checked="" type="checkbox"/> | <input type="checkbox"/> | <input type="checkbox"/>            | 3    |
|                    | 31  | Details of segmentation reliability analysis                       | <input type="checkbox"/>            | <input type="checkbox"/> | <input checked="" type="checkbox"/> |      |
|                    | 32  | Feature scaling details (e.g., normalization, standardization)     | <input checked="" type="checkbox"/> | <input type="checkbox"/> | <input type="checkbox"/>            | 3    |
|                    | 33  | Dimension reduction details                                        | <input checked="" type="checkbox"/> | <input type="checkbox"/> | <input type="checkbox"/>            | 3    |
| Modeling           | 34  | Algorithm details                                                  | <input checked="" type="checkbox"/> | <input type="checkbox"/> | <input type="checkbox"/>            | 3    |
|                    | 35  | Training and tuning details                                        | <input checked="" type="checkbox"/> | <input type="checkbox"/> | <input type="checkbox"/>            | 3    |
|                    | 36  | Handling of confounders                                            | <input checked="" type="checkbox"/> | <input type="checkbox"/> | <input type="checkbox"/>            | 3-4  |
|                    | 37  | Model selection strategy                                           | <input checked="" type="checkbox"/> | <input type="checkbox"/> | <input type="checkbox"/>            | 3    |
| Evaluation         | 38  | Testing technique (e.g., internal, external)                       | <input checked="" type="checkbox"/> | <input type="checkbox"/> | <input type="checkbox"/>            | 4    |
|                    | 39  | Performance metrics and rationale for choosing                     | <input checked="" type="checkbox"/> | <input type="checkbox"/> | <input type="checkbox"/>            | 4    |
|                    | 40  | Uncertainty evaluation and measures (e.g., confidence intervals)   | <input checked="" type="checkbox"/> | <input type="checkbox"/> | <input type="checkbox"/>            | 3-4  |
|                    | 41  | Statistical performance comparison (e.g., DeLong's test)           | <input checked="" type="checkbox"/> | <input type="checkbox"/> | <input type="checkbox"/>            | 3-4  |
|                    | 42  | Comparison with non-radiomic and combined methods                  | <input checked="" type="checkbox"/> | <input type="checkbox"/> | <input type="checkbox"/>            | 3-4  |
|                    | 43  | Interpretability and explainability methods                        | <input checked="" type="checkbox"/> | <input type="checkbox"/> | <input type="checkbox"/>            | 4    |
| Results            |     |                                                                    |                                     |                          |                                     |      |
|                    | 44  | Baseline demographic and clinical characteristics                  | <input checked="" type="checkbox"/> | <input type="checkbox"/> | <input type="checkbox"/>            | 4    |
|                    | 45  | Flowchart for eligibility criteria                                 | <input checked="" type="checkbox"/> | <input type="checkbox"/> | <input type="checkbox"/>            | 2    |
|                    | 46  | Feature statistics (e.g., reproducibility, feature selection)      | <input type="checkbox"/>            | <input type="checkbox"/> | <input checked="" type="checkbox"/> |      |
|                    | 47  | Model performance evaluation                                       | <input checked="" type="checkbox"/> | <input type="checkbox"/> | <input type="checkbox"/>            | 4    |
|                    | 48  | Comparison with non-radiomic and combined approaches               | <input checked="" type="checkbox"/> | <input type="checkbox"/> | <input type="checkbox"/>            | 4    |
| Discussion         |     |                                                                    |                                     |                          |                                     |      |
|                    | 49  | Overview of important findings                                     | <input checked="" type="checkbox"/> | <input type="checkbox"/> | <input type="checkbox"/>            | 4-5  |
|                    | 50  | Previous works with differences from the current study             | <input checked="" type="checkbox"/> | <input type="checkbox"/> | <input type="checkbox"/>            | 4-5  |
|                    | 51  | Practical implications                                             | <input checked="" type="checkbox"/> | <input type="checkbox"/> | <input type="checkbox"/>            | 5    |
|                    | 52  | Strengths and limitations (e.g., bias and generalizability issues) | <input checked="" type="checkbox"/> | <input type="checkbox"/> | <input type="checkbox"/>            | 5    |

| Section                   | No. | Item                                              | Yes                                 | No                       | n/a                                 | Page                 |
|---------------------------|-----|---------------------------------------------------|-------------------------------------|--------------------------|-------------------------------------|----------------------|
| <b>Open Science</b>       |     |                                                   |                                     |                          |                                     |                      |
| <i>Data availability</i>  | 53  | Sharing images along with segmentation data [n/e] | <input type="checkbox"/>            | <input type="checkbox"/> | <input checked="" type="checkbox"/> | <input type="text"/> |
|                           | 54  | Sharing radiomic feature data                     | <input type="checkbox"/>            | <input type="checkbox"/> | <input checked="" type="checkbox"/> | <input type="text"/> |
| <i>Code availability</i>  | 55  | Sharing pre-processing scripts or settings        | <input checked="" type="checkbox"/> | <input type="checkbox"/> | <input type="checkbox"/>            | appe                 |
|                           | 56  | Sharing source code for modeling                  | <input checked="" type="checkbox"/> | <input type="checkbox"/> | <input type="checkbox"/>            | appe                 |
| <i>Model availability</i> | 57  | Sharing final model files                         | <input type="checkbox"/>            | <input type="checkbox"/> | <input checked="" type="checkbox"/> | <input type="text"/> |
|                           | 58  | Sharing a ready-to-use system [n/e]               | <input type="checkbox"/>            | <input type="checkbox"/> | <input checked="" type="checkbox"/> | <input type="text"/> |

Kocak B, Baessler B, Bakas S, Cuocolo R, Fedorov A, Maier-Hein L, Mercaldo N, Müller H, Orhac F, Pinto Dos Santos D, Stanzione A, Ugga L, Zwanenburg A. CheckList for EvaluAtion of Radiomics research (CLEAR): a step-by-step reporting guideline for authors and reviewers endorsed by ESR and EuSoMII. Insights Imaging. 2023 May 4;14(1):75. doi: 10.1186/s13244-023-01415-8
